# Supplementary material for: Genome-wide characterization of endogenous retroviruses in snub-nosed monkeys
Source: PeerJ. 2019 Mar 18;7:e6602. doi: 10.7717/peerj.6602 (PMC6428148; doi:10.7717/peerj.6602)
Supplement: File S1 — The region, length, accession number and structure information of all ERV sequences in the golden snub-nosed monkey. [file peerj-07-6602-s001.xlsx]

## Sheet: Sheet1
No.	No. of accession	Accession	Region		Length	5LTR		PBS		Gag		Pro		Pol		Env		PPT		3LTR
1	1	NW_010830483.1	8525	554	7971	8525	8292	8283	8266	7878	6316	6312	5995	5994	2710	2695	1025	995	972	787	554
2	1		359101	367780	8679	63	290	467	484	1547	2683	\	\	2601	6879	6799	8325	\	\	8351	8630
3	2	NW_010787118.1	13326	17381	4055	\	\	13326	13343	13355	14750	14805	15119	15122	17897	\	\	\	\	\	\
4	2		1060608	1064713	4105	\	\	\	\	\	\	1060608	1060637	1061865	1065008	1064669	1064713	\	\	\	\
5	2		259204	266261	7057	\	\	\	\	259204	261101	262020	262073	262546	265478	266226	266261	\	\	\	\
6	2		663896	671701	7805	663896	664299	664308	664325	664721	666283	666287	666604	666605	670781	670787	671206	671423	671440	671301	671701
7	3	NW_010800369.1	1272493	1263880	8613	\	\	\	\	1272503	1271357	1271336	1270926	1270924	1268275	1264628	1264581	1263895	1263880	\	\
8	3		1556931	1567138	10207	1556931	1557444	1557616	1557633	1558779	1560224	1560277	1560491	1563992	1564290	1565541	1567138	\	\	\	\
9	3		2213630	2220636	7006	2213630	2216420	\	\	2216480	2216569	2217887	2218111	2218092	2221310	\	\	\	\	\	\
10	3		3386001	3379797	6204	3386001	3385618	3385610	3385593	3385008	3383354	3383293	3382769	3382766	3380924	\	\	3380353	3380335	3380180	3379797
11	3		3785902	3793855	7953	3785902	3786135	3786144	3786161	3786557	3788119	3788123	3788440	3788441	3791725	3791740	3793410	3793440	3793463	3793622	3793855
12	3		4661023	4652674	8349	4661023	4659369	\	\	4660072	4659609	4658747	4658724	4658220	4656710	4654998	4654379	4654102	4654084	4654328	4652674
13	3		742153	737460	4693	742153	741674	741694	741677	741298	739791	739790	739272	739268	736055	\	\	\	\	737938	737460
14	4	NW_010827891.1	1107118	1116251	9133	1107118	1107406	1107440	1107457	1107690	1107779	1110085	1110114	1113297	1113588	1115769	1115804	\	\	1115963	1116251
15	4		1221009	1228000	6991	1221009	1221301	1221453	1221470	1222867	1224264	1224317	1224649	1225509	1227730	\	\	\	\	1227710	1228000
16	4		1395113	1411309	16196	1395113	1395277	1395271	1395288	1400525	1403123	\	\	1403582	1405679	1409251	1409286	\	\	1411145	1411309
17	4		279513	273173	6340	279513	279354	279345	279328	278544	277468	277411	276896	276893	274862	\	\	273188	273173	\	\
18	4		667539	659870	7669	667539	667194	667190	667174	666010	664639	664635	664066	664065	661977	661967	660318	\	\	660213	659870
19	4		869618	874227	4609	\	\	869618	869635	870031	871593	871597	871914	871915	874837	\	\	\	\	\	\
20	5	NW_010815698.1	109119	119066	9947	109119	109211	109521	109538	109934	111496	111500	111817	111818	115003	114576	115284	\	\	117877	119066
21	5		263385	271518	8133	263385	263494	\	\	263970	265700	265736	266020	266021	269552	270184	271124	271521	271538	271272	271518
22	5		689312	679688	9624	689312	686403	686412	686395	687130	686288	684900	684871	683023	682743	680549	680514	\	\	682597	679688
23	6	NW_010803524.1	1485777	1476243	9534	1485777	1485678	1485645	1485628	1484822	1484200	1482370	1482347	1481507	1480262	1476918	1476883	1476809	1476778	1476633	1476243
24	6		2993451	3001276	7825	2993451	2993575	2993703	2993720	2994116	2995678	2995682	2995999	2996000	2999284	2999299	3000969	3000999	3001022	3001152	3001276
25	7	NW_010829089.1	378929	370935	7994	378929	378691	378683	378666	378240	376702	376698	376381	376380	373096	372903	371492	371395	371378	371173	370935
26	8	NW_010790137.1	1504	9514	8010	1504	1797	1801	1818	2214	3776	3780	4097	4098	7382	7397	9067	9097	9119	9223	9514
27	9	NW_010830687.1	7057	14890	7833	7057	7176	7353	7370	7766	9328	9332	9649	9650	12929	12944	14614	14644	14667	14771	14890
28	10	NW_010818921.1	1098279	1104807	6528	\	\	1098279	1098296	1098692	1100254	1100258	1100575	1102334	1102613	1104320	1104355	1104780	1104807	\	\
29	10		2794016	2782575	11441	2794016	2793626	2793612	2793595	2791831	2791742	\	\	2786779	2785294	2785451	2782165	\	\	2782963	2782575
30	11	NW_010810277.1	8207	1173	7034	8207	7912	7919	7902	7387	6105	6210	5551	5213	2977	3076	1666	1510	1491	1448	1173
31	12	NW_010816529.1	3409520	3398398	11122	3409520	3407018	3407015	3406998	3406589	3405247	3405244	3404789	3403036	3402754	3398407	3398372	3398417	3398398	\	\
32	12		3548643	3540343	8300	3548643	3548410	3548401	3548384	3547989	3546426	3546422	3546105	3546104	3542840	3542124	3540788	3540758	3540735	3540576	3540343
33	12		3604166	3613625	9459	3604166	3604558	3604564	3604581	3606266	3607666	3607741	3607983	3607899	3611252	3611264	3613082	\	\	3613226	3613625
34	12		3820961	3806273	14688	3820961	3820416	3820388	3820371	3817651	3817562	3815521	3815498	3813951	3810926	3810991	3808050	3807659	3807644	3806902	3806273
35	12		3944263	3938224	6039	\	\	\	\	3945426	3944186	3943777	3943727	3943897	3940437	3939463	3939398	3938242	3938224	\	\
36	12		814981	803153	11828	814981	814720	\	\	813682	813641	813587	813534	810806	810257	803801	803766	\	\	803414	803153
37	13	NW_010807801.1	22859	30372	7513	22859	22986	23151	23168	23564	25126	25130	25447	25448	28732	28747	30083	30113	30136	30245	30372
38	14	NW_010793979.1	87219	94237	7018	87219	87343	87490	87507	87903	89465	89469	89786	89787	93071	93331	94302	\	\	94113	94237
39	15	NW_010798922.1	1038081	1044754	6673	1038081	1038314	1038323	1038340	1038736	1040298	1040302	1040619	1040620	1043904	\	\	1044742	1044754	\	\
40	15		1300576	1296659	3917	\	\	\	\	1300576	1299159	1299098	1298946	1298944	1295589	\	\	\	\	\	\
41	16	NW_010827929.1	105322	110742	5420	105322	107176	107208	107225	106852	106911	108596	108628	\	\	\	\	108822	108892	108884	110742
42	16		1482588	1475565	7023	1482588	1482437	1482276	1482259	1480281	1480258	\	\	1479289	1479257	1478007	1475935	1475879	1475856	1475722	1475565
43	16		810582	802629	7953	810582	810349	810340	810323	809927	808365	808361	808044	808043	804759	804744	803074	803044	803021	802862	802629
44	17	NW_010788370.1	499762	484933	14829	499762	498617	498616	498599	497156	497067	494945	494916	494132	491615	488314	488279	486565	486549	485449	484933
45	17		669306	662105	7201	669306	669182	669035	669018	668622	667060	667056	666739	666738	664097	664082	662412	662382	662359	662229	662105
46	17		741452	738851	2601	\	\	\	\	\	\	\	\	741452	740739	740553	738904	738872	738851	\	\
47	18	NW_010809619.1	69782	60407	9375	69782	69305	69278	69261	68650	67058	67054	66740	66739	62960	63011	60946	60881	60867	60892	60407
48	18		113241	109981	3260	113241	112914	112888	112871	112668	111276	\	\	110836	110807	\	\	\	\	110306	109981
49	18		243672	251625	7953	243672	243905	243914	243931	244327	245889	245893	246210	246211	249495	249510	251180	251210	251233	251392	251625
50	19	NW_010794091.1	661	1839	1178	\	\	\	\	259	1554	\	\	\	\	\	\	\	\	\	\
51	20	NW_010801658.1	918106	926777	8671	\	\	918106	918123	918115	919061	919013	919902	919904	922642	925808	926208	\	\	926612	926777
52	20		142428	134524	7904	142428	142251	142242	142225	141829	140267	140263	139946	139945	136655	136640	134970	134940	134917	134702	134524
53	20		849953	856910	6957	849953	850465	850455	850472	850615	852001	851914	852793	852786	855344	855893	856351	\	\	856403	856910
54	21	NW_010813469.1	2566	5	2561	\	\	\	\	2566	1052	976	767	412	5	\	\	\	\	\	\
55	22	NW_010829903.1	1148217	1155061	6844	1148217	1148649	1148638	1148655	1149051	1150613	1150617	1150934	1150935	1154939	\	\	\	\	1154638	1155061
56	22		3297054	3314702	17648	3297054	3297385	3297392	3297409	3298761	3300048	3300544	3300567	3302868	3302900	3307043	3307078	3308814	3308826	3313011	3314702
57	23	NW_010830618.1	165439	173393	7954	165439	165673	165682	165699	166095	167657	167661	167978	167979	171263	171278	172948	172978	173001	173160	173393
58	24	NW_010814075.1	279614	292613	12999	279614	279732	279739	279756	281878	281967	283473	283496	285639	285686	290074	290109	291297	291317	292203	292613
59	24		460817	453239	7578	460817	460410	460406	460389	459995	458518	458514	458197	458196	454912	\	\	\	\	453647	453239
60	25	NW_010819229.1	197572	213077	15505	197572	197976	\	\	199307	199396	200424	200453	202348	204682	209652	209687	211006	211034	\	\
61	25		309567	301662	7905	309567	309312	309166	309149	308753	307192	307188	306937	306936	303654	303639	301939	301939	301922	301917	301662
62	25		774970	796016	21046	774970	775269	\	\	783078	783167	784725	784748	785219	787826	789603	789638	789574	789593	\	\
63	25		818703	826981	8278	818703	821704	821736	821753	821061	821150	821793	821822	822525	823512	822032	825535	\	\	823983	826981
64	26	NW_010790928.1	1974	3	1971	\	\	1974	1957	1561	57	56	3	\	\	\	\	\	\	\	\
	27	NW_010788907.1	\
65	28	NW_010819853.1	146	3228	3082	\	\	\	\	\	\	\	\	32	3791	\	\	\	\	\	\
66	28		930566	942761	12195	930566	930925	\	\	931507	932812	932698	933610	933585	936840	940146	942480	942747	942761	\	\
67	28		1040525	1049602	9077	\	\	\	\	\	\	\	\	1039811	1043169	1046014	1046257	1047800	1047818	1048982	1049602
68	28		1368252	1361767	6485	\	\	\	\	1369226	1367582	1367756	1366638	1364940	1364656	1362667	1362632	1362151	1362131	1361955	1361767
69	28		1437697	1426165	11532	1437697	1436895	1436888	1436871	1434720	1433483	\	\	1432603	1430830	1428941	1428897	\	\	1426668	1426165
70	28		1520242	1510863	9379	1520242	1519937	1519623	1519606	1519147	1517062	1517221	1516259	1516295	1513915	1513934	1512026	1512067	1512043	1511169	1510863
71	28		309543	300180	9363	309543	309281	309261	309244	308400	306669	306393	306561	306146	303559	303448	301613	301670	301647	301121	300180
72	28		416353	424110	7757	416353	416482	416485	416502	416582	418305	418203	419064	419058	421475	421595	424087	423770	423789	423981	424110
73	28		546582	552371	5789	546582	546840	546846	546863	547290	548843	548847	549164	549165	552123	\	\	\	\	552114	552371
74	28		654947	667421	12474	654947	655052	655073	655090	655868	657707	657692	659037	659042	661559	663215	665897	665840	665860	667272	667421
75	28		705022	700681	4341	\	\	\	\	705022	704314	\	\	703349	700313	\	\	\	\	\	\
76	29	NW_010823963.1	148243	140230	8013	148243	148005	147997	147980	147554	146001	145997	145680	145679	142392	142534	140788	140691	140674	140468	140230
77	29		2071254	2065672	5582	\	\	\	\	2071264	2070260	2070239	2069829	2069050	2066949	\	\	2065689	2065672	\	\
78	30	NW_010829614.1	1255735	1270846	15111	1255735	1256129	\	\	1256249	1256338	1257808	1257837	1261872	1261898	1264975	1266678	1268466	1268495	1270180	1270846
79	30		1494931	1500137	5206	1494931	1495512	1496017	1496034	1496737	1497921	1498065	1498094	1498131	1500506	\	\	\	\	\	\
80	30		1591502	1580892	10610	1591502	1590806	\	\	1588856	1588155	1586730	1586701	1585182	1584895	1582384	1582349	1581588	1580892	\	\
81	30		1619075	1627298	8223	1619075	1619524	1619532	1619549	1619975	1621528	1621532	1621849	1621850	1625137	1624995	1626741	1626838	1626855	1626850	1627298
82	31	NW_010803996.1	32960	47689	14729	32960	33180	33576	33593	35485	35574	37450	37473	39935	41075	44748	44783	\	\	47475	47689
83	31		2507192	2523160	15968	2507192	2507354	\	\	2507880	2512776	\	\	2514028	2517026	\	\	2522483	2522510	2523008	2523160
84	31		405059	397052	8007	405059	404826	404820	404803	404377	402824	402820	402503	402502	399215	399366	397535	397317	397304	397285	397052
85	32	NW_010787470.1	918048	925566	7518	918048	918259	918513	918530	918890	920502	920506	920823	920824	924033	924083	925289	925572	925586	925357	925566
86	32		227892	236397	8505	227892	228229	228237	228254	228705	230221	230225	230542	230543	233041	\	\	\	\	236067	236397
87	32		709908	698076	11832	709908	709706	709693	709676	709571	708007	708034	707140	707146	700216	700277	698524	698436	698417	698277	698076
88	32		805894	798382	7512	805894	805755	805749	805732	805673	803927	804023	803150	803183	800501	800649	798514	798720	798701	798520	798382
89	33	NW_010792151.1	68451	58994	9457	68451	67527	67558	67541	67559	65983	65843	65550	65580	63484	61979	58377	59008	58994	\	\
90	33		1138374	1143564	5190	1138374	1138851	1138854	1138871	1139227	1140839	1140840	1141358	1141362	1144311	\	\	\	\	\	\
91	33		1661952	1669685	7733	\	\	\	\	1661952	1663465	1663469	1663786	1663787	1667085	1668787	1669234	1669658	1669685	\	\
	34	NW_010788599.1	x
92	35	NW_010822152.1	638065	626864	11201	638065	637972	637959	637942	635979	634413	634409	634092	634091	630804	630946	629200	628003	627981	626969	626864
93	36	NW_010828839.1	32295	37725	5430	\	\	32295	32312	32763	34279	34309	34599	34600	37896	\	\	\	\	\	\
	37	NW_010826001.1	x
94	38	NW_010829030.1	262896	270448	7552	262896	263145	263151	263168	263263	265050	264936	265812	265797	268279	268297	270150	270071	270090	270199	270448
95	38		321775	313826	7949	321775	321414	321424	321407	319828	318416	318380	318030	318027	316020	315998	314548	\	\	314187	313826
96	38		430441	438910	8469	430441	430660	430684	430701	431685	433442	433352	434233	434218	436809	436784	438702	438579	438598	438670	438910
97	38		696512	688181	8331	696512	695954	695806	695789	695365	693810	693806	693489	693488	690201	690008	688597	\	\	688738	688181
98	38		844626	851747	7121	844626	845080	845083	845100	845420	847133	847065	847307	847137	850038	851621	851656	851718	851747	\	\
99	39	NW_010794754.1	3538	80	3458	\	\	\	\	3838	2675	2599	2390	2035	80	\	\	\	\	\	\
100	40	NW_010788062.1	772711	764873	7838	772711	772486	772478	772461	772050	770516	770512	770195	770194	766895	766883	765234	765202	765181	765098	764873
101	41	NW_010809500.1	45598	31563	14035	45598	45335	45339	45323	45206	44808	44458	43703	43700	41117	35289	35254	\	\	31818	31563
102	41		200223	187729	12494	200223	200029	199999	199982	198908	196917	196862	196617	196615	192433	190354	190319	\	\	187924	187729
103	41		515752	508206	7546	515752	515535	515323	515306	514900	513353	513349	513032	513031	510036	510109	508535	508469	508447	508423	508206
104	42	NW_010829724.1	371769	379708	7939	371769	371878	371891	371908	373802	373891	375024	375664	376715	376998	378441	378829	\	\	379606	379708
105	42		790108	797143	7035	\	\	\	\	790108	791624	791628	791945	791946	794233	794728	794769	797122	797143	\	\
106	43	NW_010792919.1	47212	64898	17686	47212	53173	\	\	55235	56469	\	\	57332	57376	63273	63314	\	\	64057	64898
107	43		1013657	1007611	6046	1013657	1013465	1013418	1013401	1013146	1012878	\	\	1013922	1009913	1008740	1008297	1007965	1007950	1007802	1007611
108	43		180497	169382	11115	180497	180349	\	\	179013	178924	178255	177773	176377	173520	169597	169562	\	\	169530	169382
109	43		834381	842339	7958	834381	834502	834858	834875	835548	836828	836832	837149	837150	840451	840487	842060	842126	842148	842218	842339
110	44	NW_010828921.1	1014747	1007018	7729	1014747	1014470	1014464	1014447	1014422	1014333	1013458	1013435	1011528	1011128	1010249	1007853	1007745	1007725	1007612	1007018
111	44		1021478	1022358	880	\	\	\	\	1020776	1020987	1021984	1022918	\	\	\	\	\	\	\	\
112	44		2159482	2166629	7147	2159482	2159613	2159891	2159908	2161893	2161982	\	\	2162750	2163048	2165446	2165481	2166460	2166474	2166497	2166629
113	44		3740009	3749856	9847	3740009	3740103	3740102	3740119	3740782	3742529	3742547	3743014	3743017	3745661	3747132	3747167	\	\	3749753	3749856
114	44		337827	346290	8463	337827	337943	337944	337961	\	\	\	\	338112	339946	344323	344358	345181	345196	346174	346290
115	44		3928946	3936538	7592	3928946	3929392	3930013	3930030	3930385	3931039	3931624	3032038	3932039	3934836	3934631	3936031	3936266	3936279	3936091	3936538
116	44		4028407	4035935	7528	4028407	4028664	4028794	4028811	4028945	4030429	4030342	4031235	4031199	4033441	4033437	4035441	4035446	4035464	4035685	4035935
117	44		4476145	4470613	5532	4476145	4475717	4475714	4475697	4475155	4474003	4473669	4473619	4473663	4471035	\	\	4471058	4471044	4471045	4470613
118	44		5076095	5065680	10415	5076095	5076003	\	\	5074820	5072826	5072805	6072488	5072487	5070230	5070027	5068604	5068507	5068490	5065791	5065680
119	44		5363793	5372215	8422	5363793	5363886	5364820	5364837	5365206	5366961	5366965	5367333	5367335	5370240	5370114	5371240	5371286	5371304	5372119	5372215
120	44		820139	812989	7150	820139	819643	819638	819621	819154	817817	817013	816984	813314	812989	\	\	\	\	\	\
121	45	NW_010823605.1	2748215	2744049	4166	\	\	\	\	2748335	2746947	2747034	2746084	2756080	2743449	\	\	\	\	\	\
122	45		314779	320950	6171	314779	314929	314937	314954	315381	316934	316938	317255	317256	319750	\	\	320936	320950	\	\
123	46	NW_010818587.1	155303	161957	6654	155303	155761	155761	155778	155990	156079	157823	157852	158081	160359	161352	161387	\	\	161499	161957
124	47	NW_010827358.1	1051041	1030075	20966	1051041	1050269	1050235	1050218	1048620	1047191	1047187	1046810	1041581	1041237	1032059	1032024	\	\	1030910	1030075
125	47		1158215	1150203	8012	1158215	1157977	1157969	1157952	1157526	1155973	1155969	1155652	1155651	1152364	1152506	1150760	1150663	1150646	1150441	1150203
126	47		179900	188070	8170	179900	180360	180366	180383	182606	182629	\	\	185017	185308	185452	187546	187936	187952	187611	188070
127	47		2177497	2162569	14928	2177497	2177354	\	\	2175714	2175625	2173700	2173671	2172495	2168215	2163242	2163207	2162812	2162798	2162722	2162569
128	48	NW_010787302.1	1049474	1041085	8389	1049474	1049067	1048285	1048268	1048274	1047147	1047013	1046633	1046632	1043485	1043279	1041543	1041483	1041465	1041493	1041085
129	48		1206809	1193945	12864	1206809	1206534	1206512	1206495	1205982	1205185	1203575	1203525	1202521	1199948	1197287	1197252	1195536	1195516	1194224	1193945
130	48		1226544	1241494	14950	1226544	1226657	\	\	1230034	1231040	\	\	1234083	1235446	1236548	1239427	1240151	1240169	1241311	1241494
131	48		1493177	1502139	8962	\	\	\	\	\	\	\	\	1492479	1495387	1501680	1501730	1502121	1502139	\	\
132	48		1584388	1576677	7711	1584388	1584170	1584151	1584134	1583242	1581181	1581175	1580930	1580929	1579083	1579041	1577725	\	\	1576895	1576677
133	48		193838	201737	7899	193838	193975	194055	194072	194425	195963	195967	196284	196285	199582	199578	201243	201275	201289	201600	201737
134	48		440518	448252	7734	440518	440904	440907	440924	441414	442655	442659	443064	443069	447204	447451	447495	448238	448252	\	\
135	48		797252	785351	11901	797252	791714	791735	791718	797876	790743	790863	789982	789989	787403	786230	785787	785455	785439	785628	785351
136	49	NW_010789194.1	149062	158359	9297	149062	149189	149457	149474	150263	151997	152001	152390	152397	155332	156805	157101	158220	158359	\	\
137	49		531600	539566	7966	531600	531773	531887	531904	532577	533857	533861	534178	534179	537488	537515	539116	539155	539177	539393	539566
138	50	NW_010824749.1	123588	129745	6157	123588	124065	124102	124119	\	\	\	\	127198	127318	128834	128869	129270	129745	\	\
139	50		2095682	2105792	10110	2095682	2095951	\	\	2097047	2099252	2099729	2099758	2099739	2102273	2104510	2105197	2105493	2105792	\	\
140	50		2116039	2123289	7250	\	\	\	\	2114636	2116935	2116939	2117358	2117361	2119962	2122402	2122455	2123269	2123289	\	\
141	50		2435792	2422611	13181	2435792	2435264	\	\	2433629	2433540	2432473	2431934	2429884	2429855	2426804	2426493	\	\	2423145	2422611
142	50		2736587	2726121	10466	2736587	2734613	2734589	2734572	2734538	2734515	2734405	2734376	2733955	2730984	2729250	2728458	2727234	2727213	2728095	2726121
143	50		815291	808405	6886	815291	815172	815166	815149	815063	814974	\	\	815359	812726	809338	809065	808873	808849	808523	808405
144	51	NW_010821604.1	1669127	1688120	18993	1669127	1669229	1669224	1669241	1671065	1671154	1674555	1674584	1680659	1681227	1686692	1686727	1687162	1687181	1687925	1688120
145	51		2383534	2387877	4343	\	\	\	\	2383177	2384430	2384434	2384751	2384752	2387907	\	\	\	\	\	\
146	51		2669787	2655116	14671	2669787	2669208	2669178	2669160	2669220	2667785	\	\	2665434	2662521	2658385	2658350	2657049	2657033	2655692	2655116
147	51		2796838	2810661	13823	2796838	2797081	\	\	2797342	2801104	2801758	2801781	2805742	2806029	2808205	2808240	2810419	2810661	\	\
148	51		389723	396597	6874	389723	389971	389987	390004	389742	391832	391850	392227	392228	394493	394385	396123	396170	396184	396348	396597
149	52	NW_010811449.1	3027	294	2733	\	\	\	\	3027	1576	1572	1318	794	294	\	\	\	\	\	\
150	53	NW_010788875.1	1646212	1637529	8683	1646212	1645241	\	\	1645319	1643766	1643613	1643394	1643547	1639489	1638893	1637245	1637551	1637529	\	\
151	53		351598	343883	7715	351598	351242	351139	351122	350413	349169	349165	348848	348847	345544	345661	344161	\	\	344239	343883
152	54	NW_010787474.1	82177	73930	8247	82177	81646	81638	81621	81062	79586	79572	79229	79228	76987	\	\	\	\	74456	73930
153	54		109576	103337	6239	109576	107957	107973	107956	107776	106584	\	\	105197	102708	\	\	\	\	\	\
154	55	NW_010827338.1	782777	790617	7840	782777	782879	782887	782904	783257	784792	784796	785113	785114	788430	788430	790125	790157	790177	790515	790617
155	56	NW_010818311.1	4694	552	4142	\	\	4694	4677	4197	2682	2678	2361	2360	51	\	\	\	\	\	\
156	56		249254	257186	7932	\	\	249254	249271	246994	250595	250542	250571	251249	256258	257145	257186	\	\	\	\
157	56		459150	450490	8660	459150	459025	\	\	458008	455560	455489	455460	455435	452188	451008	450973	451180	451165	450678	450490
158	56		672167	666604	5563	\	\	\	\	674155	671879	671875	671558	671557	667993	668274	666300	666635	666604	\	\
159	56		733439	739269	5830	733439	733561	733584	733601	733739	736308	736422	736451	736627	739797	\	\	\	\	\	\
160	57	NW_010828860.1	1035486	1039292	3806	\	\	\	\	1035030	1036625	1036629	1037001	1037004	1040183	\	\	\	\	\	\
161	57		1293224	1287125	6099	1293224	1293092	1293055	1293038	1292811	1291449	1291504	1290958	1290343	1288435	1286924	1286889	1287142	1287125	\	\
162	57		462716	470106	7390	\	\	\	\	462929	464179	464183	464605	464606	467279	469287	469322	470091	470106	\	\
163	57		536210	542889	6679	\	\	536210	536227	536615	538176	538180	538479	538498	540702	542134	542199	542873	542889	\	\
164	57		825914	832959	7045	825914	826653	826615	826632	827246	827885	\	\	\	\	\	\	831128	831150	832220	832959
165	58	NW_010788609.1	15844	7113	8731	15844	15177	15174	15157	14631	13315	13311	12994	12993	12379	\	\	\	\	7779	7113
166	59	NW_010829798.1	952110	960303	8193	952110	954997	\	\	954546	954635	\	\	\	\	957837	957872	957878	957917	957409	960303
167	59		448581	430030	18551	448581	448016	448037	448020	442302	442213	440960	440931	436610	436321	431736	431701	431520	431503	430587	430030
168	59		520931	526014	5083	\	\	520931	520948	521302	522960	522968	523623	523626	526155	\	\	\	\	\	\
169	59		649212	637575	11637	649212	648706	648703	648686	648083	646572	646568	646251	646250	645379	\	\	\	\	638079	637575
170	60	NW_010811812.1	633457	640245	6788	633457	633742	\	\	634341	635354	635358	635675	635676	638224	638220	639930	639917	639940	639960	640245
171	61	NW_010829962.1	296765	305002	8237	296765	296901	296981	296998	297446	298977	298981	299298	299299	302598	302594	305249	\	\	304866	305002
172	61		301510	304596	3086	\	\	\	\	\	\	\	\	300040	302598	302594	304259	304581	304596	\	\
173	62	NW_010817871.1	1453069	1461094	8025	1453069	1453334	1453537	1453554	1453954	1455512	1455516	1455839	1455842	1459122	1458975	1461113	1460825	1460843	1460816	1461094
174	62		1661633	1676156	14523	1661633	1661812	\	\	1663863	1665448	\	\	1665687	1667189	1674363	1674398	1675719	1675742	1675933	1676156
175	62		2008092	2014479	6387	2008092	2009217	2009246	2009264	2009333	2009422	\	\	\	\	2012699	2012734	2013223	2013242	2013354	2014479
176	62		2247921	2240417	7504	\	\	\	\	2247921	2247880	\	\	2245496	2242559	2242544	2240875	2240845	2240822	2240830	2240417
177	63	NW_010801714.1	355906	363433	7527	355906	356233	356241	356258	356672	358229	358233	358556	358559	361436	361328	362821	362973	362991	363106	363433
178	63		431083	441504	10421	431083	431583	431573	431590	432118	433712	435668	438595	435668	437995	439115	440841	440992	441006	441005	441504
179	64	NW_010819203.1	520909	516821	4088	\	\	\	\	522350	520338	520126	519483	518395	516821	\	\	\	\	\	\
180	64		760833	754405	6428	760833	760709	760562	760545	760149	758637	\	\	758628	756389	756374	754711	753710	753691	754529	754405
181	65	NW_010824106.1	94416	102670	8254	94416	94749	94910	94927	95056	97017	96897	97778	97781	100357	100891	102362	102828	102845	102356	102670
182	65		1086810	1094158	7348	1086810	1086906	1087104	1087121	1087281	1087370	1088532	1088555	1090493	1090525	1093054	1093321	1093912	1093927	1094062	1094158
183	65		1120740	1111442	9298	1120740	1120521	1120487	1120470	1120089	1118323	1118319	1118002	1118001	1114755	1114619	1112925	1112443	1112428	1111783	1111442
184	65		1605615	1598405	7210	1605615	1605445	1605437	1605420	1605021	1603462	1603458	1603141	1603140	1600101	1600177	1598895	1598865	1598847	1598575	1598405
185	65		652949	647632	5317	652949	652597	652594	652577	652224	650738	\	\	\	\	\	\	\	\	647992	647632
	66	NW_10813130.1	x
186	67	NW_010819933.1	19510	25671	6161	19510	20012	20004	20021	20465	21974	21978	22148	22151	24736	\	\	25509	25520	25166	25671
187	68	NW_010830462.1	146836	155293	8457	146836	146973	147053	147070	147436	148958	148962	149279	149280	152578	152570	154239	154271	154285	155156	155293
188	69	NW_010791352.1	20820	7988	12832	20820	20723	20086	20069	18403	16871	16867	16550	16549	13262	13404	11658	11561	11544	8145	7988
189	69		969368	955239	14129	969368	968107	968822	968805	967315	967226	965592	965542	964135	964082	962688	955072	\	\	960835	955239
190	69		1692553	1685130	7423	1692553	1692410	1692383	1692366	1692002	1689961	1689752	1689729	1689831	1687691	1687487	1685506	1685447	1685429	1685269	1685130
191	69		164544	172729	8185	164544	164720	164964	164981	165184	166716	166751	166990	167117	170238	172187	172222	\	\	172543	172729
192	69		3723110	3719828	3282	\	\	\	\	3723159	3722057	3722153	3721294	3721292	3719325	\	\	\	\	\	\
193	69		4234001	4241371	7370	4234001	4234128	\	\	4234898	4235697	4235935	4235967	4237115	4237955	4241054	4241089	4240907	4240919	4241224	4241371
194	70	NW_010820466.1	1134800	1131618	3182	\	\	1134800	1134783	1134380	1132756	1132752	1132435	1132434	1131504	\	\	\	\	\	\
195	70		1778534	1766931	11603	1778534	1777898	1777927	1777910	1777440	1777115	\	\	1771310	1770118	1771305	1767787	1768063	1768043	1767558	1766931
196	71	NW_010830030.1	113000	118833	5833	113000	113480	113483	113500	113633	115030	114943	115902	115903	119378	\	\	\	\	\	\
197	71		419920	412924	6996	419920	419812	\	\	419083	417704	417700	417484	417480	414911	414915	413261	413229	413207	413070	412924
198	72	NW_010830698.1	3828	21441	17613	3828	4094	4098	4115	9314	9403	11589	11612	14098	14299	18324	18359	20334	20354	21172	21441
199	72		996749	988665	8084	996749	996613	996533	996516	995913	994379	994375	994058	994057	990758	990746	989097	989065	989044	988801	988665
200	72		821655	816509	5146	821655	821223	821220	821203	821153	819537	819529	819179	818903	816489	\	\	\	\	816509
201	73	NW_010803213.1	1840340	1832086	8254	1840340	1840007	1839846	1839829	1839700	1837739	1837859	1836978	1836975	1834399	1834453	1832394	1832450	1832435	1832400	1832086
202	73		160906	167709	6803	160906	161361	161325	161342	161983	163499	163503	163820	163821	166403	167790	167825	167692	167709	\	\
203	73		202443	215292	12849	202443	202881	202911	202928	203454	206304	\	\	208943	211704	214712	214747	\	\	214857	215292
204	74	NW_010789701.1	1519164	1529028	9864	\	\	\	\	1519164	1520028	1521028	1521658	1521659	1524938	1527352	1528142	1529014	1529028	\	\
205	74		140875	134677	6198	140875	138200	138718	138701	138214	136606	136602	136105	136148	134036	\	\	\	\	\	\
206	74		2278276	2270995	7281	2270995	2276558	2276615	2276598	2276256	2274821	2274247	2274215	2273030	2269836	\	\	\	\	\	\
207	74		2784231	2790313	6082	2784231	2784552	2784667	2784684	2785941	2786869	\	\	2784710	2787839	2789404	2789481	2789857	2789870	2789935	2790313
208	74		2844225	2836033	8192	2844225	2843777	2843774	2843757	2843343	2841785	2841781	2841464	2841463	2838237	2839148	2838342	2837456	2837442	2836483	2836033
209	74		3666877	3658921	7956	3666877	3666730	3666719	3666702	3665595	3663466	\	\	\	\	3661600	3659454	3659389	3659368	3659077	3658921
210	74		3932493	3939225	6732	3932493	3932879	3932882	3932899	3933300	3935102	3935112	3935437	3935439	3938021	\	\	\	\	3938839	3939225
211	74		638778	647725	8947	638778	639250	639253	639270	639669	641395	641428	641760	641761	645051	645437	647177	647280	647293	647255	647725
	75	NW_010798355.1	x
212	76	NW_010818530.1	1128588	1120396	8192	1128588	1128415	1128301	1128284	1127878	1126330	1126326	1126033	1126032	1122429	1122402	1120827	1120761	1120739	1120569	1120396
213	76		1260576	1252278	8298	1260576	1260254	\	\	1258622	1257568	\	\	1256423	1256391	1254089	1254054	1252764	1252726	1252604	1252278
214	76		1621592	1629677	8085	1621592	1622104	1622094	1622111	1622257	1623636	1623537	1624438	1624417	1628449	1627545	1627589	1629660	1629677	\	\
215	76		419205	434642	15437	419205	419735	419765	419782	422653	423517	423516	423545	426373	426660	432099	432134	433472	433803	434112	434642
216	76		780109	778165	1944	\	\	\	\	\	\	\	\	780220	777692	\	\	\	\	\	\
217	77	NW_010828971.1	1357568	1352089	5479	1357568	1357160	1357160	1357143	\	\	\	\	1357000	1353437	1353441	1352504	1352517	1352494	1352503	1352089
218	77		2512099	2516134	4035	2512099	2512509	2512513	2512530	2513381	2513998	\	\	\	\	2515101	2515136	\	\	2515722	2516134
219	77		2673900	2677430	3530	\	\	\	\	2673688	2675110	2675049	2675078	2677398	2677430	\	\	\	\	\	\
220	77		250707	243632	7075	250707	250547	250539	250522	250340	249403	\	\	248936	246373	244365	244330	243785	243767	243796	243632
221	77		2963107	2961125	1982	\	\	\	\	2962756	2962214	2962210	2961893	2961892	2960477	\	\	\	\	\	\
222	78	NW_010823294.1	51517	58805	7288	51517	51764	\	\	51828	53631	53635	53951	53952	57122	57106	58478	58396	58418	58558	58805
223	79	NW_010789365.1	20857	17572	3285	\	\	20857	20840	20449	18679	18675	18301	18299	15870	\	\	\	\	\	\
224	79		120952	114444	6508	120952	120736	120711	120694	121062	119860	119856	119539	119538	116258	116012	114193	114555	114537	114696	114444
225	79		251974	243573	8401	251974	251393	251400	251383	250582	248847	248843	248409	248407	245697	245495	244023	243999	243971	243845	243573
226	80	NW_010792786.1	335605	344170	8565	335605	335709	335716	335734	336147	337681	338523	338840	338841	342139	342135	343857	343844	343867	343887	344170
227	80		538640	531068	7572	538640	538467	\	\	\	\	538330	538307	538458	535428	533647	531575	\	\	531243	531068
228	81	NW_010819497.1	1309344	1294644	14700	1309344	1308926	1308944	1308927	1306977	1306092	\	\	1303629	1302052	\	\	1295221	1295204	1295067	1294644
229	81		951176	946721	4455	951176	949942	950228	950211	949683	948488	948451	948037	948036	945999	\	\	\	\	\	\
230	81		1679467	1687132	7665	1679467	1679604	1679684	1679701	1680054	1681590	1681594	1681911	1681912	1685569	1685350	1686716	1686748	1686769	1686995	1687132
231	81		2111540	2105101	6439	2111540	2111187	2110780	2110763	2109295	2107888	2107884	2107564	2107561	2104378	\	\	\	\	\	\
232	81		545970	553819	7849	545970	546305	546323	546340	546845	547967	\	\	549279	551681	553898	553933	553804	553819	\	\
233	81		741228	733614	7614	\	\	\	\	741257	739882	739543	739370	739367	736393	733580	733545	733634	733614	\	\
234	82	NW_010792444.1	101133	111965	10832	101133	101303	102105	102122	102167	103971	104286	104309	104163	106982	109553	109588	109472	109486	111736	111965
235	82		258842	261965	3123	\	\	258842	258859	259286	260825	260829	261146	261465	261965	\	\	\	\	\	\
	83	NW_010806913.1	x
236	84	NW_010818533.1	1317667	1307317	10350	1317667	1317546	1317565	1317548	1317566	1316058	1316054	1315827	1312270	1311983	1311411	1309214	\	\	1307468	1307317
237	84		387923	399712	11789	387923	388443	388416	388433	389952	390041	391284	391307	392796	392831	398315	398350	398897	398915	399195	399712
238	84		430033	420404	9629	430033	429813	429521	429504	427780	426419	426415	425951	425950	422802	421408	421367	420421	420404	\	\
	85	NW_010790309.1	\
239	86	NW_010817296.1	2264	66	2198	\	\	2264	2247	1851	171	95	66	\	\	\	\	\	\	\	\
240	87	NW_010812047.1	61873	70871	8998	\	\	\	\	61528	63129	63132	63554	63557	66597	69935	69970	70853	70871	\	\
241	88	NW_010800452.1	2572417	2578656	6239	2572417	2572757	2572775	2572792	2573313	2574848	2574855	2575241	2575246	2578184	\	\	2578641	2578656	\	\
242	88		1621956	1628278	6322	\	\	\	\	1621956	1622045	1622849	1622872	1623413	1626528	1627686	1627721	1627873	1627888	1626159	1628278
243	88		1861469	1854048	7421	1861469	1861236	1861228	1861211	1860817	1859265	1859261	1858944	1858943	1856178	1856172	1854493	1854463	1854440	1854281	1854048
244	88		2625466	2635314	9848	2625466	2625934	2625938	2625955	2626685	2627794	2628006	2628209	2627925	2632196	2634950	2634985	2635294	2635314	\	\
245	88		2881872	2875568	6304	2881872	2881312	2881312	2881296	2881196	2881107	\	\	2879634	2879602	2876583	2876548	2877000	2876981	2875840	2875568
246	88		285588	281753	3835	285588	284787	285205	285188	284855	283849	283819	283240	283238	281350	\	\	\	\	\	\
247	88		3371961	3378193	6232	3371961	3372645	3372648	3372665	3372725	3374300	3374518	3374823	3374826	3377874	\	\	\	\	3377808	3378193
248	88		353585	338684	14901	353585	353150	\	\	352549	352460	350967	350938	346873	346847	341015	340980	339489	339471	339121	338684
249	89	NW_010800505.1	506446	512001	5555	506446	508389	\	\	508015	509336	509412	509621	509976	512001	\	\	\	\	\	\
	90	NW_010794345.1	\
250	91	NW_010788637.1	1035122	1027195	7927	1035122	1034792	1034486	1034469	1033322	1031947	1031889	1031341	1029030	1028746	\	\	1027207	1027195	\	\
251	91		1154637	1160844	6207	1154637	1154747	1155127	1155143	1155883	1157847	1157851	1158204	1158205	1161816	\	\	\	\	\	\
252	91		2026547	2014405	12142	2026547	2026453	2026423	2026406	2024573	2024020	\	\	2022510	2020447	2016776	2016741	2015704	2015676	2014496	2014405
253	91		2725501	2736940	11439	2725501	2725501	2725571	2725588	2728612	2729567	\	\	2730538	2733578	\	\	2735648	2735669	2736847	2736940
254	91		3169806	3177487	7681	3169806	3170218	3170222	3170239	3170635	3172032	\	\	3174263	3176458	\	\	3177067	3177090	3177079	3177487
255	91		3438197	3445964	7767	3438197	3438675	\	\	3440340	3440429	\	\	3441314	3441888	\	\	3443570	3443602	3445486	3445964
256	91		649590	655871	6281	649590	649882	649878	649895	\	\	651336	651365	651922	654825	655262	655327	655597	655617	655579	655871
257	92	NW_010810082.1	50410	57137	6727	50410	50602	50593	50610	50914	52465	52604	53290	53277	56320	56964	56999	56865	56885	56945	57137
258	92		346593	339636	6957	346593	344941	\	\	344815	344726	\	\	\	\	344151	342601	341461	341439	341288	339636
259	92		731199	739471	8272	\	\	\	\	731282	731950	732161	732190	733086	736307	736766	738228	738307	738324	737971	739471
260	92		833482	841615	8133	833482	833932	833935	833952	\	\	\	\	835864	839149	839644	841116	841146	841163	841161	841615
	93	NW_010805663.1	\
261	94	NW_010813515.1	1173801	1163599	10202	1173801	1173641	1173674	1173658	1172296	1171197	\	\	1169877	1167480	1165625	1165317	1165186	1165163	1163758	1163599
262	94		2814440	2809746	4694	\	\	\	\	\	\	\	\	2814758	2811462	2811466	2809756	2809769	2809746	\	\
263	94		289238	302058	12820	289238	289740	289708	289725	295380	295469	296651	296680	298966	299256	301055	301090	300942	300956	301559	302058
264	94		3029314	3035767	6453	3029314	3030429	3030417	3030434	3030359	3030448	\	\	3033062	3033358	\	\	3034869	3034892	3034650	3035767
265	94		3201456	3197663	3793	\	\	\	\	3201456	3200724	3200779	3399971	3199968	3196980	\	\	\	\	\	\
266	95	NW_010805899.1	2213577	2207931	5646	\	\	\	\	\	\	\	\	2213870	2211708	2211816	2209979	2209928	2209907	2209028	2207931
267	95		2380056	2370617	9439	2380056	2379645	2379633	2379616	2377439	2376280	2376152	2376129	2376080	2372390	2372996	2372952	2370857	2370842	2371035	2370617
268	95		2855597	2845399	10198	2855597	2855501	2854903	2854886	2854470	2852769	2852765	2852324	2852323	2849198	2847738	2847703	2847530	2847514	2845504	2845399
269	95		3297978	3306475	8497	\	\	3297978	3297995	3298122	3299644	3299460	3300396	3300383	3303199	3303091	3306670	3306454	3306475	\	\
270	95		5169667	5161829	7838	5169667	5169196	5169193	5169176	5168804	5167052	\	\	5164430	5164401	5161873	5161829	\	\	\	\
271	95		5949074	5940708	8366	5949074	5948976	5948527	5948510	5948148	5946891	5946887	5946576	5945250	5944929	\	\	5942399	5942375	5940826	5940708
272	95		6165183	6154792	10391	6165183	6165090	6165058	6165041	6162208	6161380	\	\	6160987	6158280	6158233	6156253	6156327	6156312	6154904	6154792
273	95		641090	652532	11442	641090	643833	\	\	644590	644239	645659	645688	646659	649052	\	\	651002	651019	649789	652532
274	96	NW_010826095.1	2508391	2500570	7821	2508391	2508268	2508278	2508261	2508213	2508124	2507266	2507243	2508023	2504746	2502965	2500881	\	\	2500693	2500570
275	96		3369210	3376855	7645	\	\	3369210	3369227	3370017	3371145	3371149	3371722	3371725	3372665	3376823	3376855	\	\	\	\
276	96		4030940	4039809	8869	4030940	4031419	4031427	4031444	4032375	4032375	4033806	4034143	4034145	4037386	4037580	4039261	4039402	4039418	4039299	4039809
277	96		753992	746914	7078	753992	753707	753532	753515	753054	752040	752033	751719	751718	749260	747397	747362	747243	747220	747200	746914
	97	NW_010810129.1	x
	98	NW_010810273.1	x
278	99	NW_010788382.1	48541	42427	6114	48541	48285	48293	48276	48528	47490	47614	46586	46616	44110	\	\	42929	42908	42793	42427
279	99		236584	242935	6351	236584	236755	236763	236780	237476	239008	239012	239329	239330	241242	241254	232979	\	\	242755	242935
280	99		448977	452067	3090	\	\	\	\	\	\	\	\	447520	449827	449921	452014	452053	452067	\	\
281	99		628934	640265	11331	628934	629054	629859	629876	630004	631965	631845	632726	632729	635271	637347	637382	638328	638349	639809	640265
282	100	NW_010819795.1	1050743	1055745	5002	1050743	1051477	1051056	1051073	1051459	1052991	1052995	1053310	1053311	1055838	\	\	\	\	\	\
283	100		406120	415574	9454	406120	406292	\	\	407172	409055	409096	409535	409538	412418	414141	414176	414681	414692	415392	415574
284	100		704292	713894	9602	704292	704405	704376	704393	704945	705629	706018	706347	708009	708308	710817	710852	711646	711660	713782	713894
