# Supplementary material for: Genome-wide characterization of endogenous retroviruses in snub-nosed monkeys
Source: PeerJ. 2019 Mar 18;7:e6602. doi: 10.7717/peerj.6602 (PMC6428148; doi:10.7717/peerj.6602)
Supplement: File S5 — All ERV neighboring genes found in the golden snub-nosed monkey, including the corresponding ERV numbers and accession numbers. [file peerj-07-6602-s005.xlsx]

## Sheet: Sheet1
No. of ERV in Golden snub-nosed monkey	Accession Number	Gene
6	NW_010787118.1	PEX3
8	NW_010800369.1	AAGAB
31	NW_010816529.1	TCAIM
34	NW_010816529.1	ZNF501
42	NW_010827929.1	IFT57
58	NW_010814075.1	FUT10
60	NW_010819229.1	PNPT1
66	NW_010819853.1	ZNF528
67	NW_010819853.1	ZNF480
69	NW_010819853.1	LOC104672730
71	NW_010819853.1	ERVV-2
72	NW_010819853.1	ZNF816
73	NW_010819853.1	LOC104672665
78	NW_010829614.1	STT3B
82	NW_010803996.1	HSD11B1
86	NW_010803996.1	LOC104664169
91	NW_010792151.1	CNTNAP5
97	NW_010830030.1	LOC104656707
100	NW_010788062.1	LOC104665903
101	NW_010809500.1	COMMD1
102	NW_010809500.1	LOC104666961
106	NW_010792919.1	NAV3
110	NW_010828921.1	LOC104682937
111	NW_010827929.1	DZIP3
120	NW_010827929.1	LOC104680582
136	NW_010789194.1	LOC104671053
137	NW_010789194.1	LOC104671223
143	NW_010821604.1	EPHX2
146	NW_010821604.1	DOCK5
151	NW_010788875.1	EIF2AK2
162	NW_010828860.1	GRIK2
165	NW_010788609.1	LOC104668408
166	NW_010829798.1	HIVEP2
192	NW_010791352.1	LPP
202	NW_010803213.1	LOC104663630
203	NW_010803213.1	LOC104663658
211	NW_010789701.1	DSG2
228	NW_010819497.1	LOC104672530
238	NW_010818533.1	ALDH1A1
243	NW_010800452.1	ARL11
246	NW_010800452.1	LOC104662770
252	NW_010788637.1	SMAP1
253	NW_010788637.1	COL19A1
255	NW_010788637.1	BAI3
267	NW_010805899.1	XRRA1
268	NW_010805899.1	PGM2L1
270	NW_010805899.1	LOC104665210
271	NW_010805899.1	RRM1
								gene=PEX3
								gene=PEX3
								gene=PEX3
								gene=PEX3
								gene=LOC104665903
								gene=ARL11
								gene=PGM2L1
								gene=PGM2L1
								gene=FUT10
								gene=FUT10
								gene=FUT10
								gene=FUT10
								gene=FUT10
								gene=FUT10
								gene=ZNF501
								gene=ZNF501
								gene=ZNF501
								gene=ERVV-2
								gene=ERVV-2
								gene=ERVV-2
								gene=ERVV-2
								gene=ERVV-2
								gene=ERVV-2
								gene=ZNF816
								gene=ZNF816
								gene=ZNF816
								gene=ZNF816
								gene=LOC104682937
