# Supplementary material for: Genome-wide characterization of endogenous retroviruses in snub-nosed monkeys
Source: PeerJ. 2019 Mar 18;7:e6602. doi: 10.7717/peerj.6602 (PMC6428148; doi:10.7717/peerj.6602)
Supplement: File S6 — All ERV neighboring genes found in the black and white snub-nosed monkey, including the corresponding ERV numbers and accession numbers. [file peerj-07-6602-s006.xlsx]

## Sheet: Sheet1
No. of ERV in Black and white snub-nosed monkey	Accession Number	Gene
1	NW_016805008.1	IFT57
2	NW_016805008.1	SLC16A4
2	NW_016805008.1	LOC108528874
3	NW_016818029.1	TM4SF18
4	NW_016818029.1	LOC108518301
8	NW_016805057.1	LOC108528985
10	NW_016805783.1	LOC108530725
11	NW_016805783.1	ARL11
14	NW_016805783.1	LOC108530746
15	NW_016814111.1	LOC108513873
17	NW_016813064.1	LOC108512380
21	NW_016808222.1	LOC108538102
22	NW_016809126.1	LOC108539708
22	NW_016809126.1	LOC108539709
23	NW_016819929.1	LOC108520088
25	NW_016805750.1	LOC108530618
26	NW_016805750.1	LOC108530599
28	NW_016804690.1	TLR5
28	NW_016804690.1	SLC16A4
28	NW_016804690.1	LOC108528252
30	NW_016804690.1	DISP1
42	NW_016805589.1	ARHGAP26
44	NW_016805589.1	LOC108530189
45	NW_016805589.1	LOC108530155
48	NW_016804051.1	ABCA10
52	NW_016806071.1	SCP2
56	NW_016812385.1	LOC108544816
66	NW_016824162.1	LOC108522041
68	NW_016803891.1	LOC108518960
71	NW_016816945.1	EWSR1
72	NW_016816945.1	CHEK2
77	NW_016807406.1	LOC108535581
77	NW_016807423.1	KIF2C
82	NW_016807758.1	LOC108536713
89	NW_016814762.1	NFATC3
92	NW_016808517.1	LOC108538623
93	NW_016808517.1	LOC108538620
103	NW_016822628.1	LOC108521259
106	NW_016804580.1	CUBN
107	NW_016804580.1	NSUN6
111	NW_016804830.1	POU2F3
112	NW_016804830.1	NECTIN1
112	NW_016804830.1	LOC108528612
112	NW_016804830.1	LOC108528595
114	NW_016806413.1	ZNF501
114	NW_016806413.1	ZNF502
125	NW_016813202.1	LOC108512500
141	NW_016826060.1	LOC108522828
147	NW_016823795.1	LOC108521848
158	NW_016803344.1	LOC108533101
170	NW_016803369.1	LOC108535483
194	NW_016804657.1	SYCP1
196	NW_016804657.1	SLC16A4
201	NW_016804657.1	LOC108528157
203	NW_016816809.1	LOC108517363
216	NW_016810019.1	ERVFRD-1
226	NW_016814655.1	LOC108515067
236	NW_016803481.1	LOC108537246
237	NW_016803481.1	DOCK5
240	NW_016819256.1	ERV3-1
255	NW_016811596.1	LOC108543641
260	NW_016813496.1	ZNF493
264	NW_016813010.1	LOC108512257
